# Supplementary material for: Microwave-assisted solution-phase preparation and growth mechanism of FeMoO4hierarchical hollow spheres
Source: Royal Society of Chemistry journal article supplement (doi:10.1039/b912555h), 2009-08-29
Supplement: b912555h.pdf [file b912555h.pdf]

## Supporting Information

### Microwave-assisted solution-phase preparation and growth mechanism of FeMoO<sub>4</sub> hierarchical hollow spheres

Lei Zhang,<sup>a</sup> Xiao-Feng Cao,<sup>a</sup> Ying-Li Ma,<sup>a</sup> Xue-Tai Chen\*<sup>a</sup> and Zi-Ling Xue<sup>b</sup>

<sup>a</sup> State Key Laboratory of Coordination Chemistry, Nanjing National Laboratory of Microstructures, School of Chemistry and Chemical Engineering, Nanjing University, Nanjing 210093, P. R. China. E-mail:

[xtchen@netra.nju.edu.cn](mailto:xtchen@netra.nju.edu.cn); Fax: +86-25-83314502.

<sup>b</sup> Department of Chemistry, The University of Tennessee, Knoxville, Tennessee 37996-1600, USA.

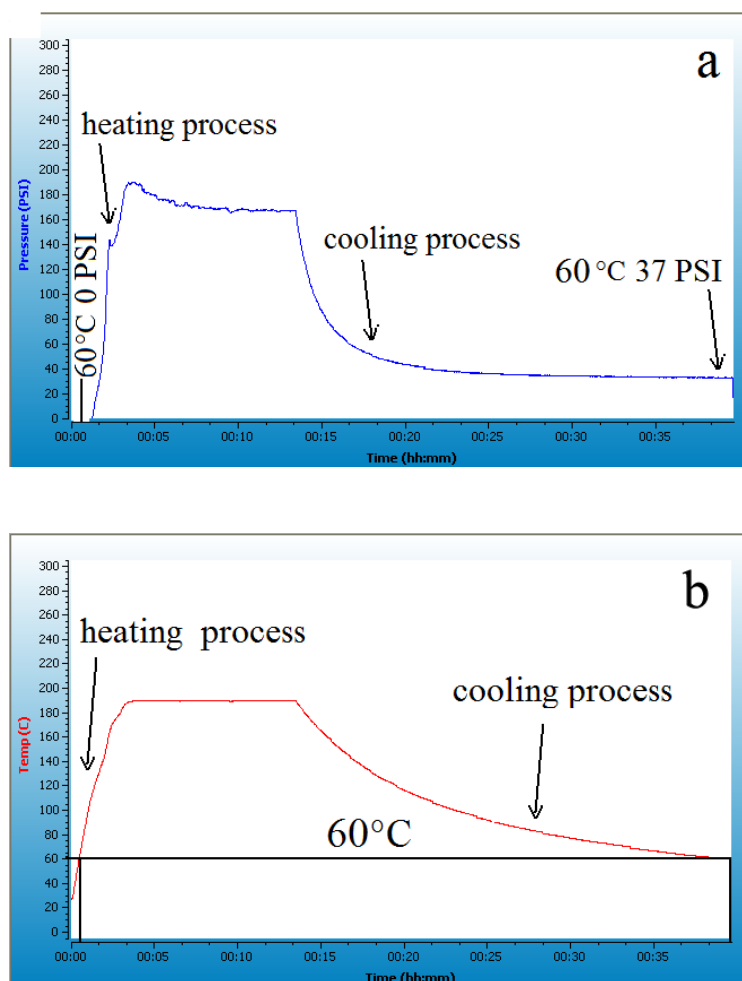

**Fig. S1.** (a) Variation curve of pressure as a function of time; (b) variation curve of temperature as a function of time.

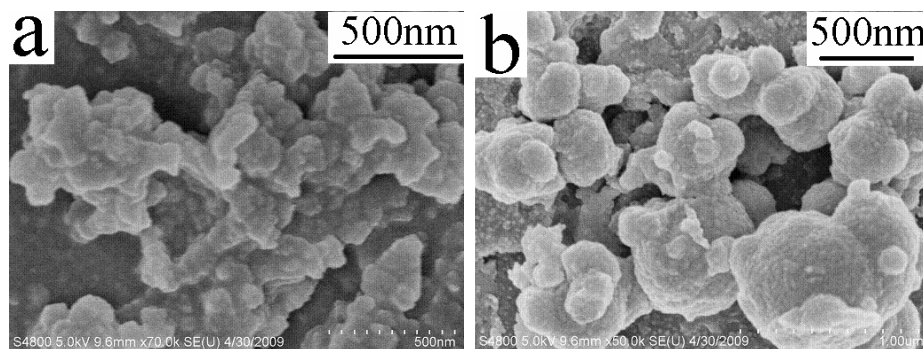

**Fig. S2.** SEM images of the as-prepared  $\text{FeMoO}_4$  at  $190\text{ }^\circ\text{C}$  with different iron sources: (a)  $\text{Fe}_2(\text{SO}_4)_3 \cdot 7\text{H}_2\text{O}$  and (b)  $\text{FeCl}_3 \cdot 6\text{H}_2\text{O}$ .

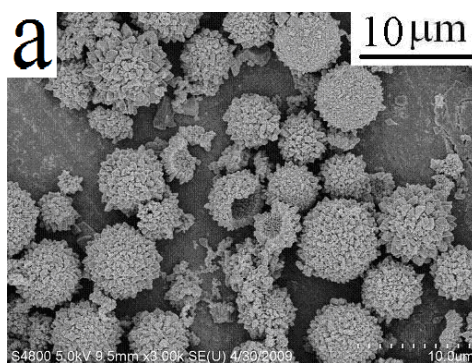

**Fig. S3.** SEM image of the as-prepared  $\text{FeMoO}_4$  using solvothermal methods at  $190\text{ }^\circ\text{C}$  for 6 h.
